# Supplementary material
Source: publisher figshare collection journal article supplement (https://springernature.figshare.com/ndownloader/files/14013995)
Supplement: Supplementary file [file 14013995]

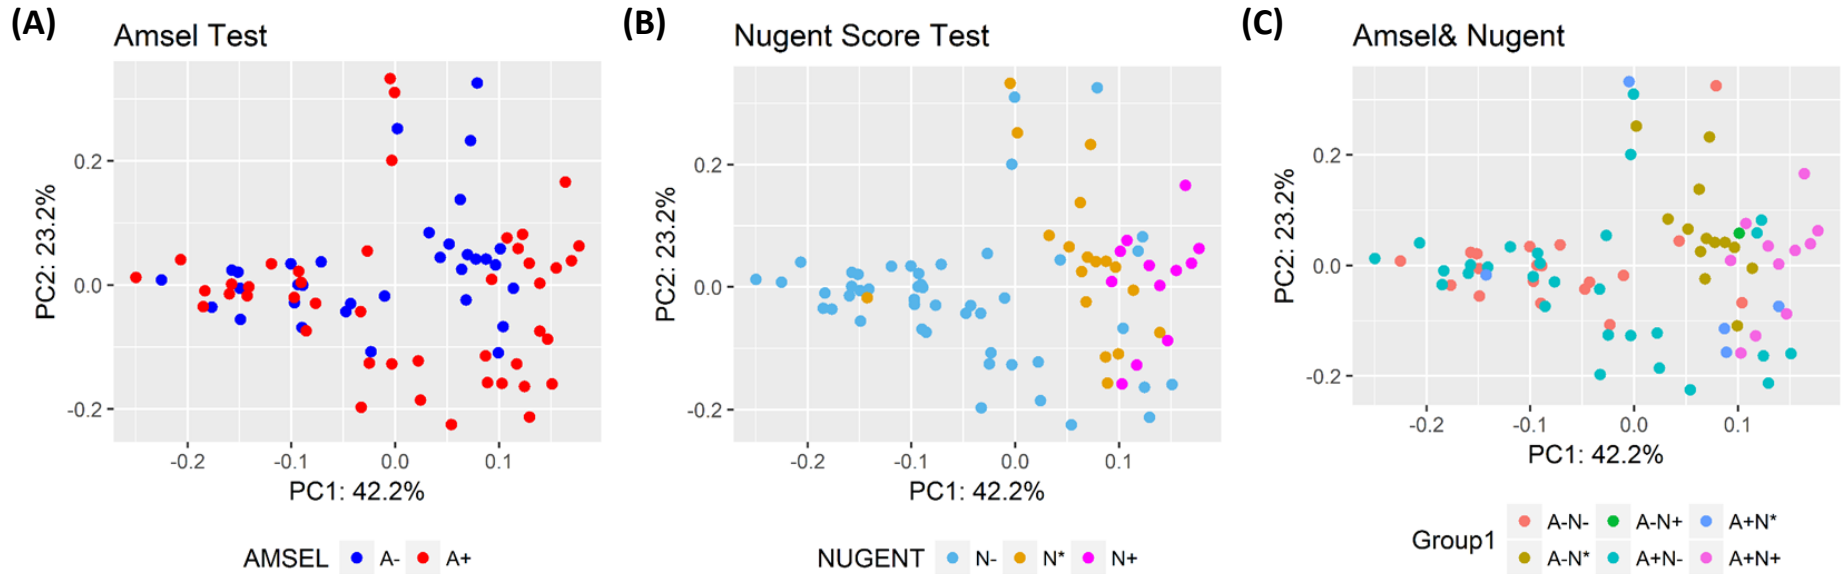

**Figure S8. Principal component analysis of 32 predictive functional modules using PICRUST in level 3 KEGG database.** Each vaginal subject is represented by a colored point. (A) Red indicates A+ subjects, and blue indicates A- subjects. (B) The three colors denote the three classes defined by the Nugent score test. Blue indicates N- subjects, orange N\* subjects, and pink N+ subjects. The vaginal subjects are separated into two clusters: the first consisting mostly of N- subjects, and the second of N\* and N+ subjects. (C) The six colors denote the six groups defined by the two BV tests.
